# Supplementary material for: South African HIV-1 subtype C transmitted variants with a specific V2 motif show higher dependence on α4β7 for replication
Source: PubMed Central journal article supplement (PMC4479312; doi:10.1186/s12977-015-0183-3), 2015-06-24

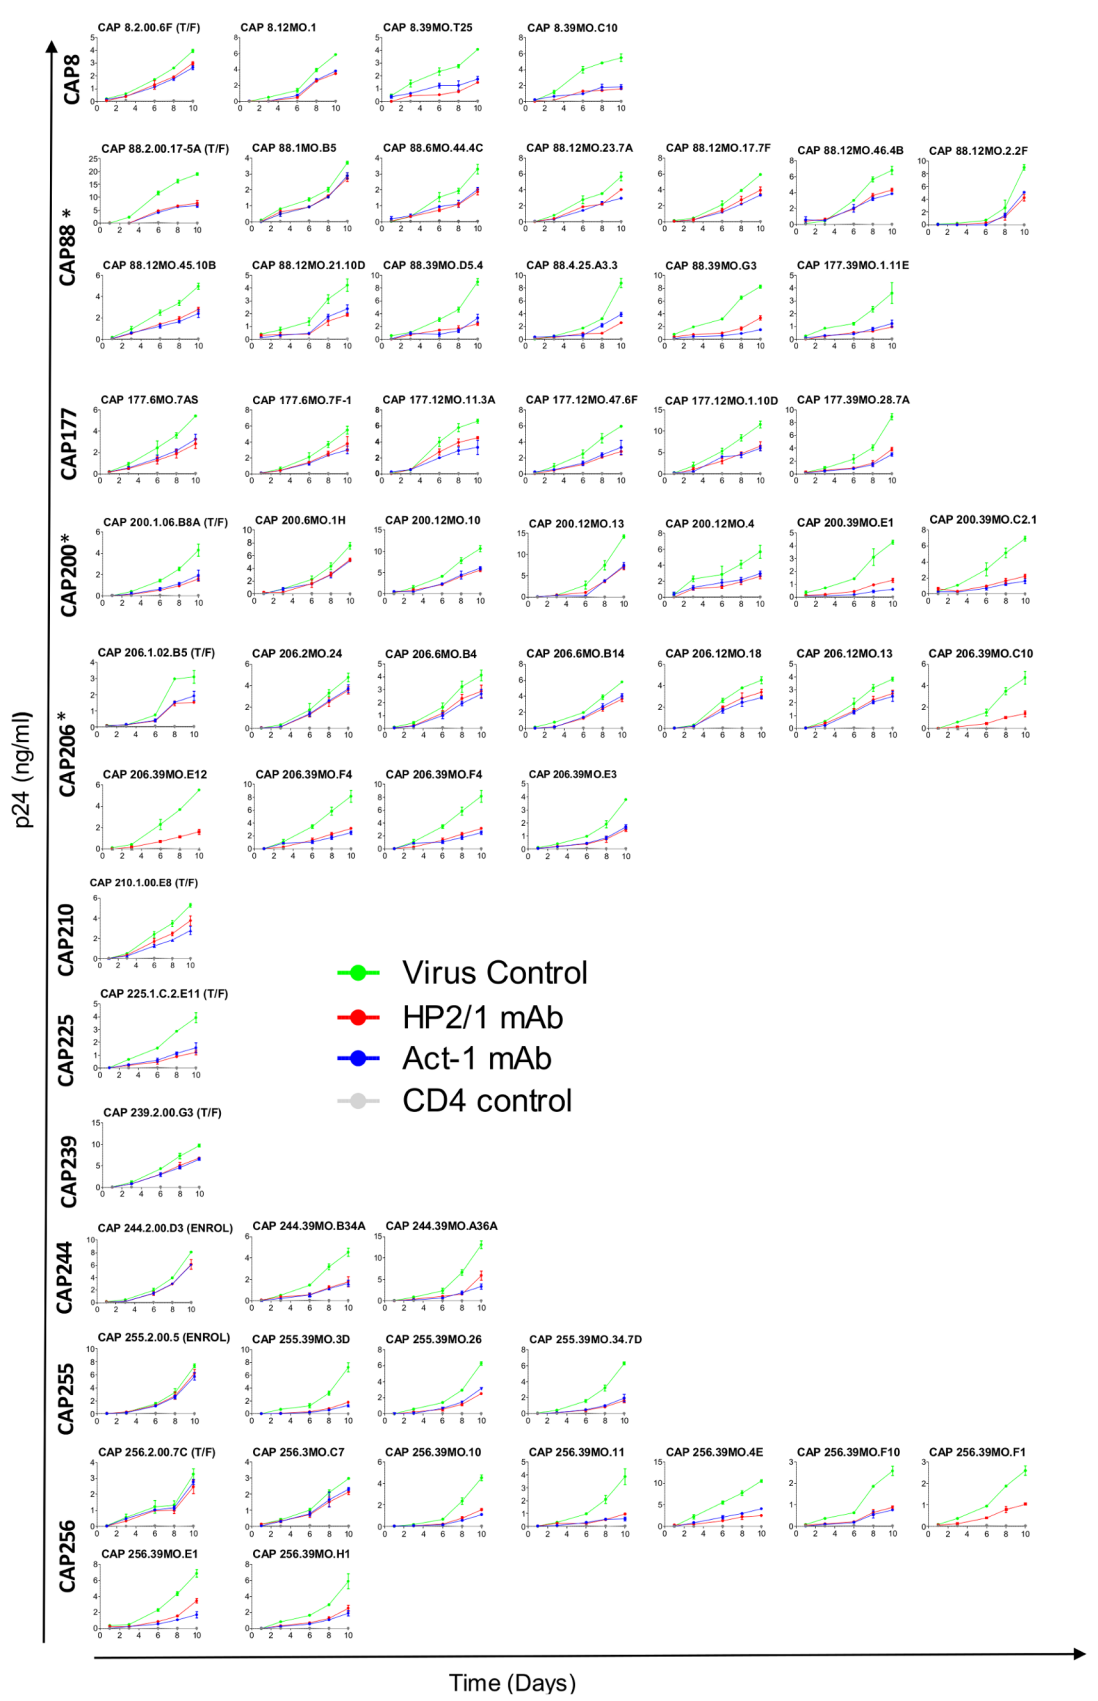

Supplement: 12977_2015_183_MOESM5_ESM.pdf [file 12977_2015_183_MOESM5_ESM.pdf]
