# Supplementary material for: South African HIV-1 subtype C transmitted variants with a specific V2 motif show higher dependence on α4β7 for replication
Source: Retrovirology. 2015 Jun 24;12:54. doi: 10.1186/s12977-015-0183-3 (PMC4479312; doi:10.1186/s12977-015-0183-3)
Supplement: Additional file 7: — gp160 sequence alignment of matched T/F and acute virus pairs. Changes between the T/F and acute (2-6 month) viruses for 3 pairs (CAP88, CAP200, CAP206) are indicated. Important functional and structural regions of gp160 are highlighted. Predicted N-linked glycans are shown in CAPS and red. [file 12977_2015_183_MOESM7_ESM.pdf]

Signal peptide gp120

Figure 1: Multiple sequence alignment of the amino acid sequence of the protein across various species. The alignment is shown in a table format with columns representing different species and rows representing different protein domains. The domains are color-coded: V1 (orange), V2 (green), V3 (blue), V4 (purple), V5 (green), Heptad N repeat (blue), Heptad C repeat (brown), MPER (green), and Cytoplasmic domain (grey). The alignment is based on the UniProt database (accession numbers: P04618, P04619, P04620, P04621, P04622, P04623, P04624, P04625, P04626, P04627, P04628, P04629, P04630, P04631, P04632, P04633, P04634, P04635, P04636, P04637, P04638, P04639, P04640, P04641, P04642, P04643, P04644, P04645, P04646, P04647, P04648, P04649, P04650, P04651, P04652, P04653, P04654, P04655, P04656, P04657, P04658, P04659, P04660, P04661, P04662, P04663, P04664, P04665, P04666, P04667, P04668, P04669, P04670, P04671, P04672, P04673, P04674, P04675, P04676, P04677, P04678, P04679, P04680, P04681, P04682, P04683, P04684, P04685, P04686, P04687, P04688, P04689, P04690, P04691, P04692, P04693, P04694, P04695, P04696, P04697, P04698, P04699, P04700, P04701, P04702, P04703, P04704, P04705, P04706, P04707, P04708, P04709, P04710, P04711, P04712, P04713, P04714, P04715, P04716, P04717, P04718, P04719, P04720, P04721, P04722, P04723, P04724, P04725, P04726, P04727, P04728, P04729, P04730, P04731, P04732, P04733, P04734, P04735, P04736, P04737, P04738, P04739, P04740, P04741, P04742, P04743, P04744, P04745, P04746, P04747, P04748, P04749, P04750, P04751, P04752, P04753, P04754, P04755, P04756, P04757, P04758, P04759, P04760, P04761, P04762, P04763, P04764, P04765, P04766, P04767, P04768, P04769, P04770, P04771, P04772, P04773, P04774, P04775, P04776, P04777, P04778, P04779, P04780, P04781, P04782, P04783, P04784, P04785, P04786, P04787, P04788, P04789, P04790, P04791, P04792, P04793, P04794, P04795, P04796, P04797, P04798, P04799, P04800, P04801, P04802, P04803, P04804, P04805, P04806, P04807, P04808, P04809, P04810, P04811, P04812, P04813, P04814, P04815, P04816, P04817, P04818, P04819, P04820, P04821, P04822, P04823, P04824, P04825, P04826, P04827, P04828, P04829, P04830, P04831, P04832, P04833, P04834, P04835, P04836, P04837, P04838, P04839, P04840, P04841, P04842, P04843, P04844, P04845, P04846, P04847, P04848, P04849, P04850, P04851, P04852, P04853, P04854, P04855, P04856, P04857, P04858, P04859, P04860, P04861, P04862, P04863, P04864, P04865, P04866, P04867, P04868, P04869, P04870, P04871, P04872, P04873, P04874, P04875, P04876, P04877, P04878, P04879, P04880, P04881, P04882, P04883, P04884, P04885, P04886, P04887, P04888, P04889, P04890, P04891, P04892, P04893, P04894, P04895, P04896, P04897, P04898, P04899, P04900, P04901, P04902, P04903, P04904, P04905, P04906, P04907, P04908, P04909, P04910, P04911, P04912, P04913, P04914, P04915, P04916, P04917, P04918, P04919, P04920, P04921, P04922, P04923, P04924, P04925, P04926, P04927, P04928, P04929, P04930, P04931, P04932, P04933, P04934, P04935, P04936, P04937, P04938, P04939, P04940, P04941, P04942, P04943, P04944, P04945, P04946, P04947, P04948, P04949, P04950, P04951, P04952, P04953, P04954, P04955, P04956, P04957, P04958, P04959, P04960, P04961, P04962, P04963, P04964, P04965, P04966, P04967, P04968, P04969, P04970, P04971, P04972, P04973, P04974, P04975, P04976, P04977, P04978, P04979, P04980, P04981, P04982, P04983, P04984, P04985, P04986, P04987, P04988, P04989, P04990, P04991, P04992, P04993, P04994, P04995, P04996, P04997, P04998, P04999, P05000, P05001, P05002, P05003, P05004, P05005, P05006, P05007, P05008, P05009, P05010, P05011, P05012, P05013, P05014, P05015, P05016, P05017, P05018, P05019, P05020, P05021, P05022, P05023, P05024, P05025, P05026, P05027, P05028, P05029, P05030, P05031, P05032, P05033, P05034, P05035, P05036, P05037, P05038, P05039, P05040, P05041, P05042, P05043, P05044, P05045, P05046, P05047, P05048, P05049, P05050, P05051, P05052, P05053, P05054, P05055, P05056, P05057, P05058, P05059, P05060, P05061, P05062, P05063, P05064, P05065, P05066, P05067, P05068, P05069, P05070, P05071, P05072, P05073, P05074, P05075, P05076, P05077, P05078, P05079, P05080, P05081, P05082, P05083, P05084, P05085, P05086, P05087, P05088, P05089, P05090, P05091, P05092, P05093, P05094, P05095, P05096, P05097, P05098, P05099, P05100, P05101, P05102, P05103, P05104, P05105, P05106, P05107, P05108, P05109, P05110, P05111, P05112, P05113, P05114, P05115, P05116, P05117, P05118, P05119, P05120, P05121, P05122, P05123, P05124, P05125, P05126, P05127, P05128, P05129, P05130, P05131, P05132, P05133, P05134, P05135, P05136, P05137, P05138, P05139, P05140, P05141, P05142, P05143, P05144, P05145, P05146, P05147, P05148, P05149, P05150, P05151, P05152, P05153, P05154, P05155, P05156, P05157, P05158, P05159, P05160, P05161, P05162, P05163, P05164, P05165, P05166, P05167, P05168, P05169, P05170, P05171, P05172, P05173, P05174, P05175, P05176, P05177, P05178, P05179, P05180, P05181, P05182, P05183, P05184, P05185, P051
